# Supplementary material for: Shear and hydrostatic stress regulate fetal heart valve remodeling through YAP-mediated mechanotransduction
Source: eLife. 2023 Apr 20;12:e83209. doi: 10.7554/eLife.83209 (PMC10162797; doi:10.7554/eLife.83209)
Supplement: Figure 1—source data 1. [file elife-83209-fig1-data1.xlsx]

## Sheet: Sheet1
VEC inflow	E11.5	nucl.	min	max		area	cyto.	min	max	VEC inflow	E14.5	nucl.	min	max		area	cyto.	min	max	VEC inflow	E17.5	nucl.	min	max		area	cyto.	min	max	OFT
1	15088.3	22.267	76	64682	1	15088.3	20.067	129	63318	1	15088.3	52.422	83	62313	1	15088.3	79.59	120	65418	1	15088.3	38.547	116	60885	1	15088.3	84.196	95	60886
2	15088.3	36.565	44	65181	2	15088.3	45.541	85	62016	2	15088.3	45.534	32	63806	2	15088.3	70.954	128	63637	2	15088.3	54.072	21	62138	2	15088.3	98.998	113	65115
3	15088.3	1.434	85	60504	3	15088.3	2.871	110	62468	3	15088.3	31.219	84	60240	3	15088.3	52.419	148	62704	3	15088.3	24.234	132	62218	3	15088.3	44.755	117	61530
4	15088.3	38.146	76	60201	4	15088.3	55.627	102	65376	4	15088.3	11.389	112	62294	4	15088.3	17.869	41	62940	4	15088.3	91.485	48	60983	4	15088.3	184.566	36	64028
5	15088.3	66.73	9	63434	5	15088.3	82.679	119	62663	5	15088.3	12.248	132	63164	5	15088.3	21.011	62	63805	5	15088.3	77.924	90	62441	5	15088.3	149.225	112	63095
6	15088.3	51.313	6	63073	6	15088.3	61.435	118	61262	6	15088.3	40.141	88	65195	6	15088.3	60.472	9	63526	6	15088.3	19.59	100	64267	6	15088.3	39.444	53	63731
VEC outflow	E11.5	nucl.	min	max		area	cyto.	min	max	VEC outflow	E14.5	nucl.	min	max		area	cyto.	min	max	VEC outflow	E17.5	nucl.	min	max		area	cyto.	min	max
1	15088.3	62.015	74	63070	1	15088.3	87.661	105	63887	1	15088.3	31.422	135	60686	1	15088.3	32.59	89	64303	1	15088.3	72.201	56	60106	1	15088.3	33.489	124	63926
2	15088.3	110.935	45	61942	2	15088.3	98.437	28	62061	2	15088.3	28.25	25	60807	2	15088.3	35.288	15	63482	2	15088.3	21.779	141	64179	2	15088.3	10.714	95	65077
3	15088.3	41.833	139	62841	3	15088.3	49.619	94	61916	3	15088.3	25.016	70	61514	3	15088.3	33.045	71	63080	3	15088.3	67.074	71	62543	3	15088.3	27.84	147	63594
4	15088.3	47.647	117	62125	4	15088.3	49.757	137	63248	4	15088.3	58.085	103	62600	4	15088.3	44.947	138	65432	4	15088.3	220.342	103	61205	4	15088.3	93.657	27	60708
5	15088.3	57.473	28	62602	5	15088.3	62.406	118	62331	5	15088.3	64.662	130	60064	5	15088.3	86.892	130	61689	5	15088.3	78.711	92	65475	5	15088.3	41.583	0	63203
6	15088.3	38.723	131	62200	6	15088.3	37.816	73	60270	6	15088.3	37.21	19	61890	6	15088.3	51.555	1	61219	6	15088.3	138.403	49	62966	6	15088.3	60.269	40	63518
VIC	E11.5	nucl.	min	max		area	cyto.	min	max	VIC	E14.5	nucl.	min	max		area	cyto.	min	max	VIC	E17.5	nucl.	min	max		area	cyto.	min	max
1	15088.3	74.615	63	64030	1	15088.3	133.741	78	64338	1	15088.3	757.351	118	60096	1	15088.3	353.255	106	60016	1	15088.3	687.56	135	63327	1	15088.3	317.96	114	63361
2	15088.3	136.793	89	63748	2	15088.3	171.634	119	63812	2	15088.3	1483.21	137	65041	2	15088.3	595.513	114	61987	2	15088.3	1227.37	83	60559	2	15088.3	745.272	48	63032
3	15088.3	480.811	67	62406	3	15088.3	589.344	19	60277	3	15088.3	497.739	93	61287	3	15088.3	260.893	95	62906	3	15088.3	1164.61	54	63486	3	15088.3	728.678	75	60900
4	15088.3	74.961	139	63545	4	15088.3	214.773	47	65201	4	15088.3	397.581	5	61623	4	15088.3	171.637	59	62131	4	15088.3	103.426	68	62712	4	15088.3	49.352	21	61116
5	15088.3	66.297	8	60530	5	15088.3	99.871	4	61255	5	15088.3	1357.37	84	60726	5	15088.3	486.598	93	60152	5	15088.3	1652.52	126	62037	5	15088.3	771.246	99	60320
6	15088.3	24.015	99	60225	6	15088.3	136.142	144	63735	6	15088.3	1507.14	120	62461	6	15088.3	646.369	150	61736	6	15088.3	1300.58	110	61374	6	15088.3	767.712	134	63135
VEC inflow	E11.5	nucl.	min	max		area	cyto.	min	max	VEC inflow	E14.5	nucl.	min	max		area	cyto.	min	max	VEC inflow	E17.5	nucl.	min	max		area	cyto.	min	max	AV
1	15088.3	31.368	115	62610	1	15088.3	39.359	101	63833	1	15088.3	93.627	108	63283	1	15088.3	95.12	7	62440	1	15088.3	344.921	95	64480	1	15088.3	415.705	147	62879
2	15088.3	41.527	142	60444	2	15088.3	68.22	135	63876	2	15088.3	383.931	62	65031	2	15088.3	434.24	124	63538	2	15088.3	603.165	73	60480	2	15088.3	782.427	36	62635
3	15088.3	48.841	129	60369	3	15088.3	55.735	130	63209	3	15088.3	258.847	90	61272	3	15088.3	232.74	124	62846	3	15088.3	141.09	105	64536	3	15088.3	191.071	110	60266
4	15088.3	35.863	15	64665	4	15088.3	43.582	46	65364	4	15088.3	70.925	102	61765	4	15088.3	71.902	122	64786	4	15088.3	324.977	0	63710	4	15088.3	451.06	28	61286
5	15088.3	74.551	150	61551	5	15088.3	86.851	62	61553	5	15088.3	139.84	2	61748	5	15088.3	174.404	12	60782	5	15088.3	91.265	37	64680	5	15088.3	118.406	84	62175
6	15088.3	65.152	53	63033	6	15088.3	68.099	112	64065	6	15088.3	93.61	52	65010	6	15088.3	135.44	4	60753	6	15088.3	134.876	39	63704	6	15088.3	170.792	30	61592
VEC outflow	E11.5	nucl.	min	max		area	cyto.	min	max	VEC outflow	E14.5	nucl.	min	max		area	cyto.	min	max	VEC outflow	E17.5	nucl.	min	max		area	cyto.	min	max
1	15088.3	50.378	96	63458	1	15088.3	60.185	128	62500	1	15088.3	617.85	98	61134	1	15088.3	493.227	39	60061	1	15088.3	154.713	43	62633	1	15088.3	130.385	88	63210
2	15088.3	27.451	123	60082	2	15088.3	40.934	91	61029	2	15088.3	549.026	84	62327	2	15088.3	521.848	63	62264	2	15088.3	420.703	146	62593	2	15088.3	295.303	22	62527
3	15088.3	77.191	98	64781	3	15088.3	97.383	126	62845	3	15088.3	41.245	39	60600	3	15088.3	44.916	123	63873	3	15088.3	1346.58	69	63379	3	15088.3	853.758	55	64505
4	15088.3	1.606	127	63108	4	15088.3	1.543	3	63627	4	15088.3	87.635	61	61262	4	15088.3	103.228	137	61784	4	15088.3	441.498	84	60238	4	15088.3	353.137	54	61889
5	15088.3	5.309	19	62766	5	15088.3	5.707	47	61727	5	15088.3	501.769	88	61809	5	15088.3	564.114	21	62219	5	15088.3	226.234	48	64571	5	15088.3	219.828	80	60299
6	15088.3	21.143	144	63796	6	15088.3	19.783	73	61871	6	15088.3	473.791	115	64504	6	15088.3	515.803	42	62988	6	15088.3	1030.52	7	61690	6	15088.3	709.642	127	64383
VIC	E11.5	nucl.	min	max		area	cyto.	min	max	VIC	E14.5	nucl.	min	max		area	cyto.	min	max	VIC	E17.5	nucl.	min	max		area	cyto.	min	max
1	15088.3	106.143	42	60866	1	15088.3	247.392	92	62215	1	15088.3	1329.95	93	62792	1	15088.3	563.313	108	64753	1	15088.3	1555.48	102	64095	1	15088.3	1328.12	13	60115
2	15088.3	197.705	0	60147	2	15088.3	240.839	77	65034	2	15088.3	427.866	136	63519	2	15088.3	200.669	35	61634	2	15088.3	216.674	106	64280	2	15088.3	229.304	10	61306
3	15088.3	296.767	90	65158	3	15088.3	348.326	44	61206	3	15088.3	1088.13	61	63456	3	15088.3	549.67	42	65475	3	15088.3	632.774	58	61767	3	15088.3	852.572	88	60653
4	15088.3	112.141	88	62150	4	15088.3	280.776	40	65162	4	15088.3	1119.89	124	60359	4	15088.3	589.245	87	64038	4	15088.3	1831.88	64	65253	4	15088.3	1178.64	27	64640
5	15088.3	24.854	116	64919	5	15088.3	31.765	94	63107	5	15088.3	50.683	102	62093	5	15088.3	26.035	20	61360	5	15088.3	262.033	76	60351	5	15088.3	304.432	76	63407
6	15088.3	195.592	65	63197	6	15088.3	519.848	88	64751	6	15088.3	248.588	132	64798	6	15088.3	125.554	13	63543	6	15088.3	1709.62	114	62791	6	15088.3	1844.77	54	60975
