# Supplementary material for: Shear and hydrostatic stress regulate fetal heart valve remodeling through YAP-mediated mechanotransduction
Source: eLife. 2023 Apr 20;12:e83209. doi: 10.7554/eLife.83209 (PMC10162797; doi:10.7554/eLife.83209)
Supplement: Figure 2—source data 1. [file elife-83209-fig2-data1.xlsx]

## Sheet: Sheet1
USS	area	nucl.	min	max		area	cyto.	min	max		OSS	area	nucl.	min	max		area	cyto.	min	max
1	45176.7	1641.75	69	65152	1	45176.7	4010.89	15	62174		1	45176.7	1433.11	37	62904	1	45176.7	475.316	89	64890
2	45176.7	559.896	126	60209	2	45176.7	1870.82	108	61008		2	45176.7	626.665	105	63842	2	45176.7	421.478	56	63936
3	45176.7	110.959	144	62042	3	45176.7	1084.84	75	60719		3	45176.7	1383.68	127	61342	3	45176.7	469.924	49	61351
4	45176.7	561.104	41	64020	4	45176.7	2566.49	95	64745		4	45176.7	564.179	32	62234	4	45176.7	202.03	138	60177
5	45176.7	1134.79	116	62631	5	45176.7	3716.58	117	63230		5	45176.7	584.47	121	60256	5	45176.7	224.615	136	61809
6	45176.7	866.345	105	60110	6	45176.7	2797.59	30	60580		6	45176.7	45.348	83	63909	6	45176.7	23.43	58	61068
7	45176.7	503.478	47	60278	7	45176.7	2591.27	66	61171		7	45176.7	401.3	105	62300	7	45176.7	184.712	26	64378
8	45176.7	726.699	1	64215	8	45176.7	4498.21	126	64749		8	45176.7	1168.73	115	64999	8	45176.7	559.822	77	62446
9	45176.7	499.23	68	63521	9	45176.7	5692.58	123	64254		9	45176.7	27.084	80	63830	9	45176.7	15.226	34	64623
10	45176.7	173.502	89	61442	10	45176.7	1927.04	43	63757		10	45176.7	531.821	149	61845	10	45176.7	192.984	87	63834
11	45176.7	434.019	12	64421	11	45176.7	3989.98	140	61199		11	45176.7	298.115	60	64903	11	45176.7	101.019	123	64062
12	45176.7	467.765	142	60460	12	45176.7	1251.23	39	65161		12	45176.7	1599.77	106	60040	12	45176.7	572.245	14	65107
13	45176.7	2125.98	133	65022	13	45176.7	4668.36	121	62214		13	45176.7	155.59	19	61286	13	45176.7	83.251	40	61099
14	45176.7	221.156	112	63315	14	45176.7	1042.46	7	64226		14	45176.7	193.866	53	62385	14	45176.7	85.071	14	65158
15	45176.7	668.023	119	62642	15	45176.7	4006.71	134	60179		15	45176.7	1033.71	115	64426	15	45176.7	314.748	110	65009
CS	area	nucl.	min	max		area	cyto.	min	max	U	area	nucl.	min	max		area	cyto.	min	max	TS	area	nucl.	min	max		area	cyto.	min	max
1	45176.7	220.558	10	62069	1	45176.7	100.41	149	65462	1	45176.7	445.151	51	62318	1	45176.7	407.198	36	65252	1	45176.7	229.609	107	62399	1	45176.7	490.073	54	61136
2	45176.7	115.321	5	60285	2	45176.7	59.33	139	63294	2	45176.7	299.957	68	61662	2	45176.7	241.972	30	65528	2	45176.7	64.085	39	64090	2	45176.7	143.035	146	62387
3	45176.7	1031.14	0	64411	3	45176.7	536.613	83	62216	3	45176.7	386.814	32	63240	3	45176.7	308.32	28	64682	3	45176.7	274.938	66	62045	3	45176.7	500.297	54	60950
4	45176.7	906.878	34	63773	4	45176.7	388.025	24	63548	4	45176.7	40.29	89	64597	4	45176.7	27.1	71	63277	4	45176.7	119.274	57	64256	4	45176.7	348.776	51	61051
5	45176.7	329.06	123	63357	5	45176.7	142.508	24	61581	5	45176.7	397.547	103	64766	5	45176.7	301.19	140	61681	5	45176.7	99.177	73	63457	5	45176.7	290.117	96	63035
6	45176.7	164.025	121	61289	6	45176.7	68.948	32	60957	6	45176.7	298.148	143	60206	6	45176.7	241.659	0	64220	6	45176.7	151.225	6	63190	6	45176.7	593.119	124	61557
7	45176.7	464.917	0	61753	7	45176.7	203.897	47	61082	7	45176.7	199.575	127	65299	7	45176.7	156.696	126	62937	7	45176.7	182.719	78	64267	7	45176.7	516.016	68	62474
8	45176.7	792.007	61	61168	8	45176.7	336.473	129	60418	8	45176.7	606.587	89	60359	8	45176.7	424.152	59	61936	8	45176.7	81.946	128	65324	8	45176.7	182.063	101	63795
9	45176.7	247.444	77	62588	9	45176.7	112.497	88	61776	9	45176.7	74.515	6	64418	9	45176.7	51.591	51	62969	9	45176.7	130.411	136	62892	9	45176.7	264.591	92	63177
10	45176.7	53.283	135	61922	10	45176.7	24.497	44	61509	10	45176.7	518.102	32	63738	10	45176.7	427.308	23	61037	10	45176.7	21.162	66	62640	10	45176.7	93.109	62	64840
11	45176.7	870.394	15	64612	11	45176.7	371.262	87	65062	11	45176.7	362.495	97	63393	11	45176.7	288.691	60	64655	11	45176.7	113.767	29	61259	11	45176.7	446.421	29	60664
12	45176.7	221.673	141	60717	12	45176.7	103.805	132	60286	12	45176.7	320.105	11	60930	12	45176.7	238.533	77	64261	12	45176.7	9.95	106	63716	12	45176.7	56.077	20	60213
13	45176.7	625.244	114	61679	13	45176.7	292.442	39	62286	13	45176.7	393.231	122	62075	13	45176.7	268.748	19	64369	13	45176.7	98.587	134	63698	13	45176.7	371.701	136	62694
14	45176.7	815.828	146	61532	14	45176.7	347.692	126	65431	14	45176.7	498.765	88	64252	14	45176.7	367.67	40	63981	14	45176.7	214.13	133	62981	14	45176.7	483.442	146	60646
15	45176.7	321.23	55	65437	15	45176.7	179.463	21	61745	15	45176.7	318.284	14	63571	15	45176.7	255.806	134	64858	15	45176.7	63.916	3	61405	15	45176.7	354.475	96	65465
