# Supplementary material for: Shear and hydrostatic stress regulate fetal heart valve remodeling through YAP-mediated mechanotransduction
Source: eLife. 2023 Apr 20;12:e83209. doi: 10.7554/eLife.83209 (PMC10162797; doi:10.7554/eLife.83209)
Supplement: Figure 3—source data 1. [file elife-83209-fig3-data1.xlsx]

## Sheet: Circ.
CS	area	diam. fit	24h	area	diam. fit	CS+VP	area	diam. fit	24h	area	diam. fit	U+VP	area	diam. fit	24h	area	diam. fit
1	28.569	7.195	1	22.434	5.615	1	26.376	7.129	1	17.22	5.444	1	23.027	7.009	1	12.867	4.822
2	27.008	6.897	2	20.645	5.344	2	22.726	6.563	2	14.991	5.034	2	21.1	6.157	2	12.904	4.566
3	23.914	6.663	3	17.836	5.041	3	29.386	7.859	3	18.536	5.923	3	20.203	5.83	3	12.721	4.433
4	29.205	7.48	4	21.471	5.579	4	25.723	6.92	4	17.105	5.325	4	27.906	7.055	4	17.119	5.246
5	28.931	7.535	5	21.041	5.559	5	27.347	6.89	5	18.778	5.373	5	20.032	5.93	5	12.376	4.436
6	26.293	6.974	6	19.643	5.285	6	21.673	6.425	6	14.264	4.924	6	27.951	7.254	6	16.752	5.284
7	25.232	6.873	7	18.747	5.18	7	21.828	6.685	7	13.923	5.06	7	20.641	6.004	7	12.781	4.501
8	24.2	7.012	8	17.333	5.092	8	29.726	7.41	8	19.836	5.711	8	21.364	6.585	8	12.409	4.661
9	26.93	7.074	9	20.076	5.35	9	27.286	7.316	9	17.729	5.578	9	24.207	6.687	9	14.626	4.906
10	25.288	6.611	10	19.506	5.167	10	24.509	6.713	10	16.39	5.178	10	27.592	7.069	10	16.815	5.226
11	29.389	7.503	11	21.609	5.596	11	22.088	6.889	11	13.805	5.173	11	22.849	6.333	11	14.117	4.738
12	28.333	7.318	12	20.96	5.491	12	24.625	7.142	12	15.629	5.395	12	22.861	6.876	12	13.177	4.832
13	27.144	7.113	13	20.209	5.372	13	27.081	7.644	13	16.897	5.736	13	24.544	7.123	13	14.15	5.007
14	27.164	6.743	14	21.28	5.347	14	28.015	7.181	14	18.724	5.538	14	24.415	6.848	14	14.509	4.95
15	29.802	7.23	15	22.827	5.613	15	22.025	6.93	15	13.684	5.192	15	28.045	7.391	15	16.568	5.314
TS	area	diam. fit	24h	area	diam. fit	TS+PY-60	area	diam. fit	24h	area	diam. fit	U+PY-60	area	diam. fit	24h	area	diam. fit
1	28.582	7.262	1	12.689	4.174	1	26.189	6.871	1	30.671	6.545	1	26.198	7.182	1	29.127	6.359
2	20.967	6.046	2	11.11	3.777	2	29.964	7.481	2	32.681	7.035	2	29.407	8.274	2	30.309	6.781
3	27.704	7.38	3	13.773	4.517	3	22.153	6.382	3	24.219	5.946	3	28.413	7.832	3	29.497	6.56
4	29.356	7.766	4	14.269	4.721	4	25.149	6.797	4	27.497	6.331	4	27.979	6.935	4	29.782	6.188
5	28.232	7.345	5	14.243	4.516	5	23.905	6.515	5	26.273	5.959	5	21.339	6.424	5	22.408	5.55
6	25.985	6.833	6	13.545	4.245	6	27.53	7.181	6	30.014	6.764	6	20.445	6.481	6	21.332	5.506
7	25.353	7.194	7	12.364	4.377	7	22.134	6.351	7	24.23	5.889	7	20.085	6.446	7	20.941	5.465
8	27.137	7.305	8	13.489	4.471	8	28.085	7.119	8	30.792	6.565	8	24.11	6.977	8	25.202	5.956
9	26.923	7.137	9	13.654	4.395	9	26.987	6.907	9	29.681	6.303	9	27.213	7.313	9	28.527	6.29
10	27.848	7.152	10	14.345	4.426	10	27.746	7.199	10	30.261	6.771	10	22.985	7.135	10	23.803	5.932
11	29.739	7.473	11	15.142	4.608	11	28.389	7.147	11	31.139	6.581	11	29.363	7.847	11	30.572	6.627
12	21.564	6.349	12	11.007	3.917	12	28.198	7.063	12	31.01	6.447	12	24.113	6.586	12	25.529	5.805
13	22.198	6.757	13	10.784	4.107	13	24.612	6.738	13	26.893	6.291	13	21.097	6.914	13	21.799	5.711
14	23.179	6.623	14	11.754	4.078	14	26.469	6.838	14	29.115	6.237	14	21.139	6.019	14	22.51	5.375
15	26.952	7.271	15	13.414	4.451	15	28.241	7.245	15	30.824	6.793	15	21.85	6.758	15	22.758	5.713

## Sheet: pHH3
CS	pHH3	total	CS+VP	pHH3	total	U+VP	pHH3	total
1	57	657	1	6	987	1	2	734
2	56	642	2	4	554	2	3	964
3	49	730	3	5	724	3	2	970
4	78	904	4	3	758	4	4	887
5	83	980	5	5	819	5	2	666
6	67	998	6	1	644	6	1	825
7	81	925	7	9	839	7	3	983
8	66	660	8	1	958	8	2	790
9	70	996	9	6	855	9	2	624
10	98	997	10	7	732	10	1	933
11	52	644	11	6	642	11	1	849
12	78	857	12	1	585	12	4	977
13	60	662	13	5	898	13	3	843
14	67	998	14	2	678	14	3	888
15	66	847	15	7	962	15	3	900
TS	pHH3	total	TS+PY-60	pHH3	total	U+PY-60	pHH3	total
1	9	545	1	59	678	1	103	977
2	15	644	2	47	535	2	84	791
3	23	853	3	76	676	3	43	574
4	21	955	4	51	600	4	86	861
5	24	964	5	58	708	5	48	618
6	21	923	6	63	760	6	72	589
7	20	627	7	41	531	7	88	736
8	22	999	8	38	532	8	113	839
9	1	728	9	74	848	9	60	606
10	17	885	10	85	872	10	88	621
11	28	929	11	80	764	11	77	853
12	17	887	12	63	742	12	75	892
13	20	993	13	62	605	13	87	757
14	27	865	14	88	682	14	113	902
15	19	668	15	42	762	15	80	855
U	pHH3	total
1	33	718
2	28	632
3	39	888
4	22	504
5	28	635
6	49	940
7	35	638
8	46	925
9	32	825
10	28	679
11	41	836
12	53	964
13	25	634
14	40	854
15	26	610

## Sheet: VE-cad
CS	area	mean	min	max	CS+VP	area	mean	min	max	U+VP	area	mean	min	max
1	45176.7	1735.94	79	61407	1	45176.7	12014.6	104	64666	1	45176.7	9297.62	30	62454
2	45176.7	2453.04	110	64883	2	45176.7	11927.3	93	61710	2	45176.7	10859.3	116	64097
3	45176.7	2133.98	6	63869	3	45176.7	13010.1	97	62967	3	45176.7	11819.3	28	61530
4	45176.7	2010.78	36	60901	4	45176.7	11280.6	53	64823	4	45176.7	11924.2	12	65040
5	45176.7	2463.41	135	61157	5	45176.7	10658.9	32	61444	5	45176.7	11411.9	149	64654
6	45176.7	1993.69	117	61994	6	45176.7	9948.51	69	61420	6	45176.7	11783.3	23	61563
7	45176.7	2141.44	47	60816	7	45176.7	11887.9	68	64180	7	45176.7	10330.5	16	63853
8	45176.7	1803.25	150	63285	8	45176.7	9335.28	85	61384	8	45176.7	10926.8	99	64850
9	45176.7	1880.95	85	60355	9	45176.7	10401.5	1	65399	9	45176.7	10677.7	131	62020
10	45176.7	2379.53	35	61242	10	45176.7	10020	44	64307	10	45176.7	10785.6	18	62760
11	45176.7	1870.33	121	63628	11	45176.7	12894.3	29	61362	11	45176.7	10370.6	57	63650
12	45176.7	2250.05	50	61149	12	45176.7	13029.6	88	65335	12	45176.7	10929.9	73	64668
13	45176.7	2694.6	71	64019	13	45176.7	11482.8	124	60658	13	45176.7	11369.9	10	63549
14	45176.7	2036.78	111	64783	14	45176.7	10244.5	134	62763	14	45176.7	10096.1	97	65103
15	45176.7	1560.66	124	64736	15	45176.7	9719.31	55	64826	15	45176.7	10580.2	150	62612
TS	area	mean	min	max	TS+PY-60	area	mean	min	max	U+PY-60	area	mean	min	max
1	45176.7	2731.36	9	60558	1	45176.7	1315.86	121	62073	1	45176.7	207.275	73	60258
2	45176.7	3039.53	130	60428	2	45176.7	2051.57	16	60800	2	45176.7	1378.43	139	61440
3	45176.7	3591	58	62936	3	45176.7	1478.27	121	63172	3	45176.7	1949.85	137	61714
4	45176.7	2629.67	56	61325	4	45176.7	1039.41	75	60274	4	45176.7	1652.98	100	60240
5	45176.7	2633.88	112	63926	5	45176.7	1109.47	26	64698	5	45176.7	541.53	149	61189
6	45176.7	2070.51	81	63528	6	45176.7	1476.34	78	64587	6	45176.7	1367.85	110	62983
7	45176.7	2300.66	149	62567	7	45176.7	2256.12	39	60451	7	45176.7	1647.68	25	63688
8	45176.7	1710.51	0	61040	8	45176.7	1891.37	139	65124	8	45176.7	1613.31	86	62072
9	45176.7	3292.89	25	64166	9	45176.7	1720.07	78	61797	9	45176.7	2206.39	40	64630
10	45176.7	3235.54	98	62098	10	45176.7	911.16	17	62101	10	45176.7	1257.34	69	62734
11	45176.7	2698.64	112	65011	11	45176.7	840.633	126	62170	11	45176.7	835.575	116	60125
12	45176.7	1298.79	59	63555	12	45176.7	1629.5	115	63244	12	45176.7	962.605	132	61260
13	45176.7	1985.1	124	61169	13	45176.7	1865.31	104	60312	13	45176.7	2632.33	52	63437
14	45176.7	2793.11	146	65363	14	45176.7	80.3937	22	60643	14	45176.7	780.22	133	62504
15	45176.7	2145.94	12	63552	15	45176.7	2481.31	6	63622	15	45176.7	1220.18	75	61330
U	area	mean	min	max
1	45176.7	2007.83	22	61637
2	45176.7	1964.43	41	64930
3	45176.7	2311.98	41	61791
4	45176.7	2489.27	146	62925
5	45176.7	1749.79	29	63290
6	45176.7	2538.09	0	63115
7	45176.7	2879.43	113	61996
8	45176.7	2167.2	66	60912
9	45176.7	2455.73	102	60328
10	45176.7	2840.64	61	64238
11	45176.7	2090.44	120	63800
12	45176.7	1651.84	82	62383
13	45176.7	2703.27	119	62851
14	45176.7	2444.08	108	64923
15	45176.7	2501.18	118	61786

## Sheet: Stra.
Control	uL	Pressure (Pa)	Cushion-1 (pixels)	Distance (mm)	Stretch ratio	Cushion-2	Distance (mm)	Stretch ratio	Cushion-3	Distance (mm)	Stretch ratio	Average stretch ratio
0	0	0	27.893	0	0.816801	33.029	0	0.816801	53.852	0	0.816801	0.816801
1	2	0.2132	45.695	0.0113001	0.980591	67.683	0.0219972	1.13564	113.633	0.0379469	1.36683	1.16102
2	4	0.4264	81.043	0.0337378	1.30582	76.528	0.0276117	1.21702	136.062	0.0521841	1.57319	1.36534
3	7	0.7462	98.061	0.0445402	1.46239	101.868	0.0436966	1.45016	172.564	0.0753543	1.90903	1.6072
4	10	1.066	100.424	0.0460402	1.48413	104.785	0.0455482	1.477	200.949	0.0933721	2.17019	1.71044
5	14	1.4924	107.28	0.0503921	1.54721	123.693	0.0575504	1.65097	214.817	0.102175	2.29778	1.83199
6	18	1.9188	126.127	0.0623556	1.72062	154.987	0.0774147	1.93889	220.495	0.105779	2.35002	2.00318
7	23	2.4518	144.368	0.0739343	1.88845	186.29	0.0972848	2.2269	226.296	0.109462	2.4034	2.17292
8	28	2.9848	150.373	0.0777461	1.9437	216.104	0.11621	2.50121	234.307	0.114547	2.4771	2.30734
9	34	3.6244	155.769	0.0811713	1.99334	277.345	0.155083	3.06467	254.7	0.127491	2.66473	2.57425
10	40	4.264	171.87	0.0913917	2.14148	320.285	0.18234	3.45974				2.80061
11	46	4.9036	178.87	0.095835	2.20589	326.123	0.186046	3.51346				2.85967
	length (mm)/pixel	0.000634766
	Inner radius (mm)	0.0563523
	Runner radius (mm)	0.0689914
			radius=0.05 mm
Activator	uL	Pressure (Pa)	Cushion-1 (pixels)	Distance (mm)	Stretch ratio	Cushion-2	Distance (mm)	Stretch ratio	Cushion-3	Distance (mm)	Stretch ratio	Cushion-4	Distance (mm)	Stretch ratio	Average stretch ratio	Stdev stretch ratio
0	0	0	37.363	0	0.816801	28.578	0	0.816801	24.083	0	0.816801	45.634	0	0.816801	0.816801	0
1	2	0.2132	45.354	0.00507241	0.890324	46.615	0.0114493	0.982753	35.613	0.00731885	0.922885	62.662	0.0108088	0.97347	0.942358	0.0386289
2	4	0.4264	53.6	0.0103067	0.966192	55.109	0.016841	1.0609	47.654	0.0149621	1.03367	76.776	0.0197679	1.10333	1.04102	0.0411442
3	7	0.7462	67.912	0.0193915	1.09787	65.637	0.0235238	1.15777	63.71	0.0251539	1.1814	87.281	0.0264361	1.19998	1.15925	0.0358029
4	10	1.066	72.035	0.0220086	1.13581	73.241	0.0283505	1.22773	73.246	0.031207	1.26913	105.177	0.0377958	1.36464	1.24933	0.058939
5	14	1.4924	79.677	0.0268595	1.20612	85.971	0.0364311	1.34485	84.75	0.0385093	1.37498	107.429	0.0392253	1.38536	1.32783	0.0741591
6	18	1.9188	85.165	0.0303431	1.25661	89.432	0.038628	1.3767	91.807	0.0429889	1.43991	113.793	0.043265	1.44391	1.37928	0.0767807
7	23	2.4518	86.787	0.0313727	1.27153	99.956	0.0453083	1.47353	103.489	0.0504042	1.54739	118.343	0.0461532	1.48577	1.44455	0.116798
8	28	2.9848	99.925	0.0397122	1.39241	109.794	0.0515531	1.56404	106.534	0.0523371	1.5754	136.546	0.0577078	1.65325	1.54628	0.085591
9	34	3.6244	105.22	0.0430733	1.44113	114.085	0.0542769	1.60352	117.807	0.0594928	1.67912	141.865	0.0610841	1.70219	1.60649	0.100563
10	40	4.264	111.889	0.0473065	1.50249	123.178	0.0600488	1.68718	118.804	0.0601256	1.6883	150.403	0.0665038	1.78074	1.66468	0.0894459
11	46	4.9036	118.901	0.0517575	1.567	129.857	0.0642884	1.74863	126.524	0.065026	1.75932	157.23	0.0708373	1.84356	1.72963	0.0902687
	length (mm)/pixel	0.000634766
									4.485			4.128
	Inner radius (mm)	0.0563523
	Runner radius (mm)	0.0689914
			radius=0.05 mm
Inhibitor
Pressure (Pa)	Cushion-1-0325 (pixels)	Distance (mm)	Stretch ratio	Cushion-2	Distance (mm)	Stretch ratio	Cushion-3	Distance (mm)	Stretch ratio	AVC-1	Distance (mm)	Stretch ratio	Average stretch ratio	Stdev stretch ratio
0	21.095	0	0.816801	40.2	0	0.816801	32.062	0	0.816801	21	0	0.816801	0.816801	0
0.2132	23.195	0.00133301	0.836123	45.398	0.00329951	0.864626	57.318	0.0160316	1.04917	22.023	0.000649365	0.826214	0.916641	0.1047
0.4264	26.173	0.00322334	0.863522	51.157	0.00695513	0.917613	59.135	0.017185	1.06589	24.021	0.00191763	0.844596	0.949008	0.100219
0.7462	28.284	0.00456333	0.882945	55.227	0.00953862	0.955059	71.314	0.0249158	1.17795	30.067	0.00575542	0.900224	1.00532	0.136118
1.066	30.15	0.0057478	0.900113	62.354	0.0140626	1.02063	73.246	0.0261422	1.19572	31.064	0.00638828	0.909397	1.03882	0.13754
1.4924	31.401	0.00654189	0.911623	66.121	0.0164538	1.05529	82.298	0.0318881	1.27901	36.125	0.00960083	0.955961	1.08197	0.16377
1.9188	35.355	0.00905176	0.948003	78.313	0.0241928	1.16747	87.367	0.0351057	1.32564	36.701	0.00996646	0.961261	1.14704	0.18057
2.4518	44.839	0.0150719	1.03526	80.225	0.0254065	1.18506	94.421	0.0395833	1.39054	40.714	0.0125138	0.998183	1.20362	0.178217
2.9848	46.943	0.0164074	1.05462	85.108	0.0285061	1.22998	103.817	0.0455476	1.47699	42.297	0.0135186	1.01275	1.25387	0.211076
3.6244	48.543	0.017423	1.06934	89.359	0.0312044	1.2691	139.607	0.0682659	1.80628	47.17	0.0166118	1.05758	1.38157	0.350832
4.264	53.543	0.0205969	1.11534	90.355	0.0318367	1.27826				48.094	0.0171983	1.06608	1.1968	0.111046
4.9036	55.579	0.0218893	1.13408	93.994	0.0341466	1.31174				50.16	0.0185098	1.08509	1.22291	0.119257
0.000634766
0.0563523
0.0689914
	radius=0.05 mm
