# Supplementary material for: Shear and hydrostatic stress regulate fetal heart valve remodeling through YAP-mediated mechanotransduction
Source: eLife. 2023 Apr 20;12:e83209. doi: 10.7554/eLife.83209 (PMC10162797; doi:10.7554/eLife.83209)
Supplement: Figure 5—source data 1. [file elife-83209-fig5-data1.xlsx]

## Sheet: Sheet1
LAV	area	nucl.	min	max		area	cyto.	min	max		LAV	L	W	Aspect
1	15088.3	1063	47	62226	1	15088.3	498.251	116	64002		1	359.636	189.282
2	15088.3	56.577	114	65385	2	15088.3	36.954	84	61881		2	487.625	248.918
3	15088.3	1328.35	60	65057	3	15088.3	674.463	80	62333		3	326.508	159.534
4	15088.3	832.411	114	64982	4	15088.3	440.724	96	61521		4	447.786	227.41
5	15088.3	1262.55	118	64099	5	15088.3	644.863	71	64309		5	320.586	151.697
6	15088.3	396.438	11	60910	6	15088.3	213.203	42	63942		6	327.7	139.581
RAV	area	nucl.	min	max		area	cyto.	min	max		RAV
1	15088.3	471.241	44	62800	1	15088.3	280.647	54	63274		1	170.826	195.792
2	15088.3	1575.78	14	60403	2	15088.3	942.014	94	61311		2	101.305	106.252
3	15088.3	949.156	101	60426	3	15088.3	498.333	142	63030		3	81.139	111.367
4	15088.3	34.012	120	64026	4	15088.3	21.379	36	64553		4	96.384	127.977
5	15088.3	596.145	145	63075	5	15088.3	369.687	1	64103		5	69	104.128
6	15088.3	922.356	76	60716	6	15088.3	512.431	127	64406		6	101.456	121.3
LAL											LAL
LAV	area	nucl.	min	max		area	cyto.	min	max		LAV
1	15088.3	3498.6	49	63473	1	15088.3	5072.49	6	60775		1	298.706	286.774
2	15088.3	2463.67	92	64568	2	15088.3	5359.48	36	62198		2	253.783	201.278
3	15088.3	1252.35	110	60537	3	15088.3	5397.35	96	61082		3	233.687	231.348
4	15088.3	156.219	54	62079	4	15088.3	420.159	6	63863		4	220.78	173.304
5	15088.3	1131.71	85	61848	5	15088.3	2445.25	86	62825		5	266.119	319.165
6	15088.3	2811.44	118	62101	6	15088.3	5809.58	146	60086		6	262.016	267.451
RAV	area	nucl.	min	max		area	cyto.	min	max		RAV
1	15088.3	844.824	78	62047	1	15088.3	433.172	134	62378		1	102.207	194.194
2	15088.3	1186.39	149	62339	2	15088.3	515.409	25	63703		2	81.205	170.953
3	15088.3	769.708	143	61846	3	15088.3	335.268	132	63427		3	83.233	184.169
4	15088.3	338.096	58	61931	4	15088.3	174.866	112	62249		4	82.522	189.196
5	15088.3	518.579	63	63686	5	15088.3	280.38	48	62246		5	86.3	193.493
6	15088.3	74.028	103	64062	6	15088.3	32.6258	27	63838		6	75.452	171.163
