# Supplementary figures and images for: Shear and hydrostatic stress regulate fetal heart valve remodeling through YAP-mediated mechanotransduction
Source: eLife journal article supplement (doi:10.7554/elife.83209), 2023-04-20

**A** Fold mRNA vs. E11.5

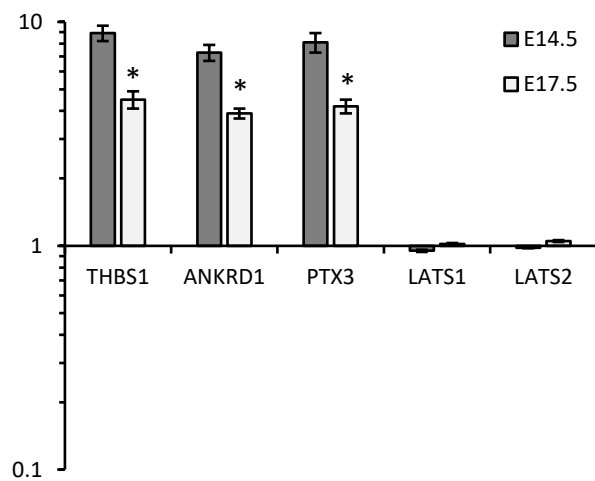

**B** Fold mRNA vs. HH25

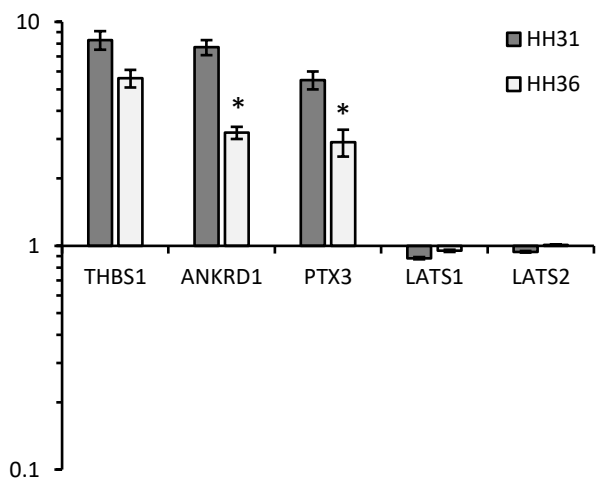

Supplement: supp [file elife-83209-supp-v1.zip]

**A**

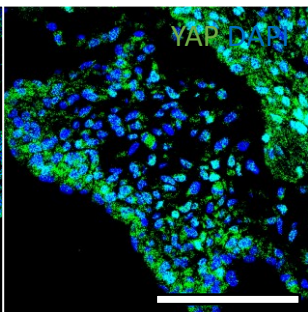

## HH25 Outflow tract cushion

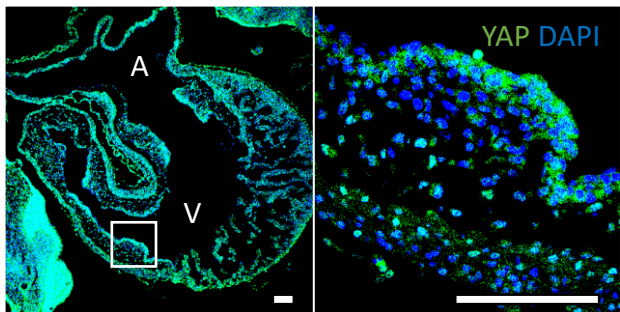

**B**

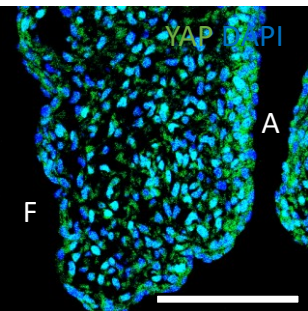

## HH31 Outflow semilunar valve

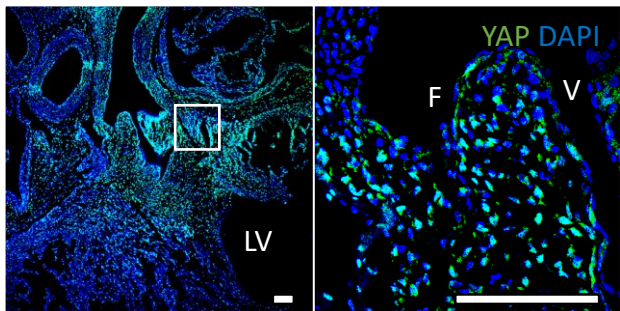

**C**

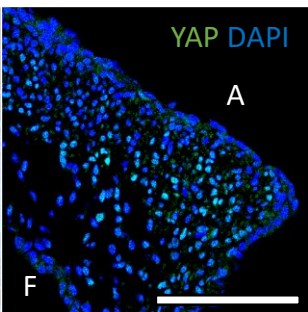

## HH36 Aortic valve

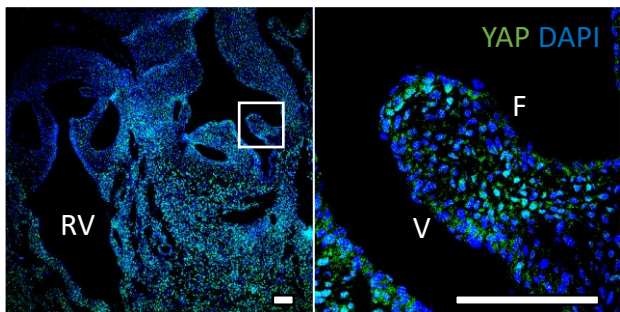

Supplement: supp [file elife-83209-supp-v1.zip]

**A**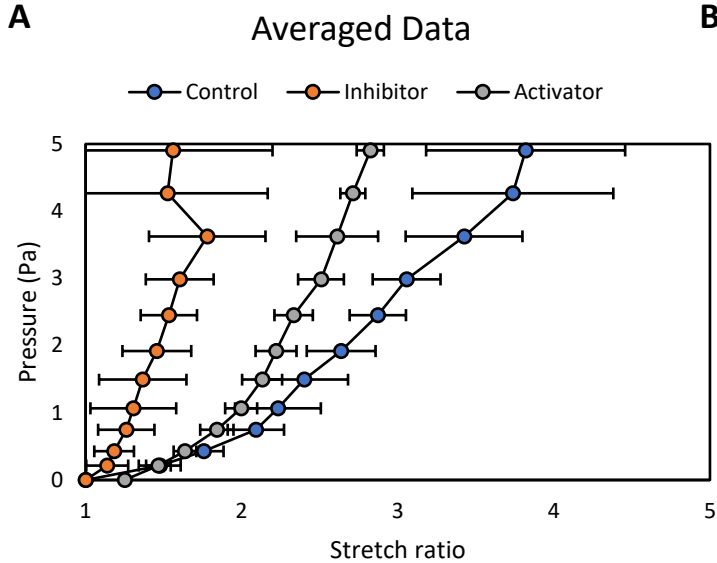**B**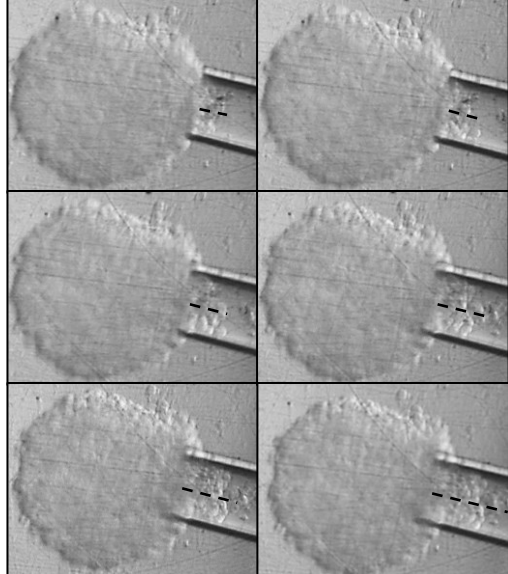

Supplement: supp [file elife-83209-supp-v1.zip]

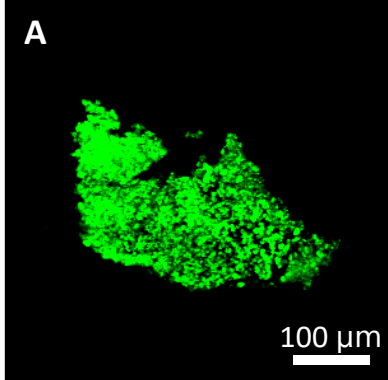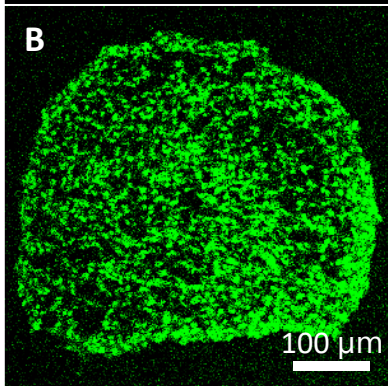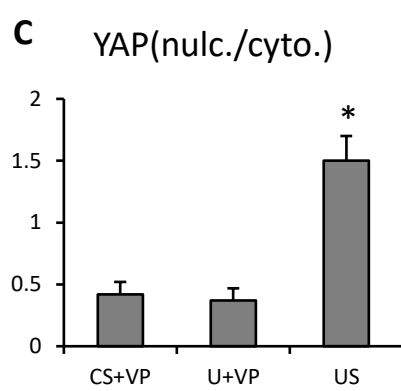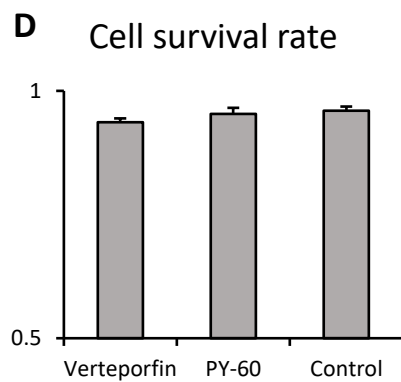

Supplement: supp [file elife-83209-supp-v1.zip]
